# Supplementary material for: Turicibacter bilis sp. nov., a novel bacterium isolated from the chicken eggshell and swine ileum
Source: PubMed Central journal article supplement — Int J Syst Evol Microbiol. 2022 Jan 27;72(1):005153. doi: 10.1099/ijsem.0.005153 (PMC8895650; doi:10.1099/ijsem.0.005153), 2022-01-27
Supplement: ijsem-72-5153-s001.pdf [file ijsem-72-5153-s001.pdf]

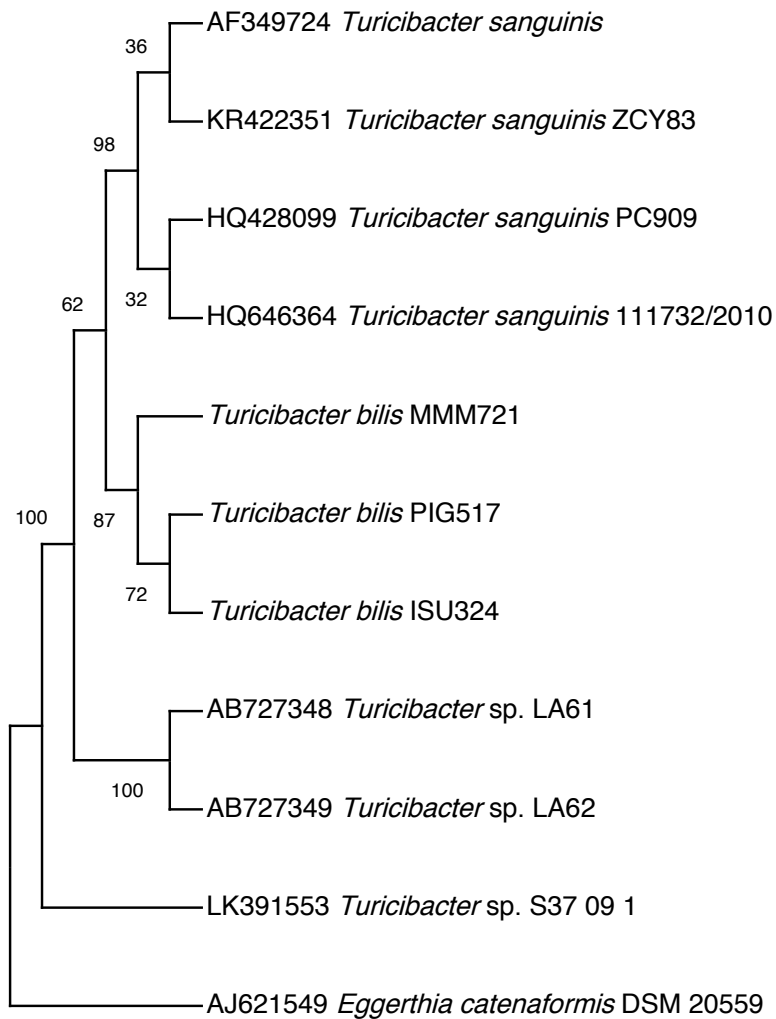

Figure S1. 16S rRNA bootstrap consensus phylogenetic tree of MMM721<sup>T</sup>, ISU324, PIG517, and publicly available 16S rRNA gene sequences from cultured *Turicibacter* isolates on the Ribosomal Database Project as of September 2021 (1). The tree is rooted by *Eggerthia catenaformis* DSM 20559. The phylogenetic tree was constructed in MEGA the neighbor-joining algorithm (2).

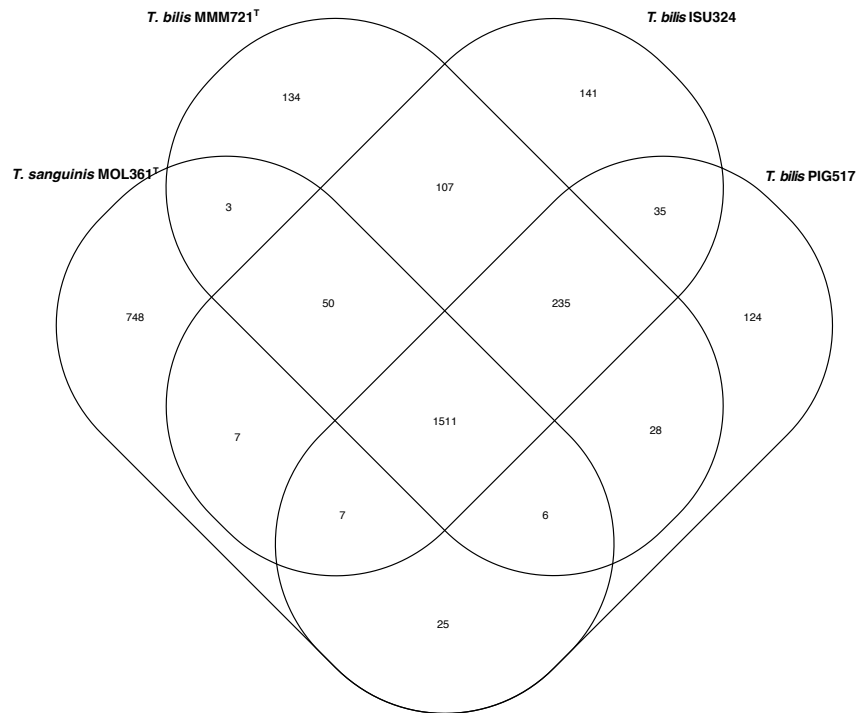

Figure S2. Venn diagram indicating shared ORFs between MMM721<sup>T</sup>, ISU324, PIG517, and *T. sanguinis* MOL361<sup>T</sup>. Genome features were downloaded from annotated genomes on the PathoSystems Resource Integration Center (PATRIC) genome database and submitted to eggNOG-mapper and annotated with default settings. The resultant data frames were imported into R and the “seed\_eggNOG\_orthologs” (the best matching gene sequence) for each ORF were compared using the venn function in R

|                              | <i>T. sanguinis</i> MOL361 <sup>T</sup> | <i>T. bilis</i> MMM721 <sup>T</sup> | <i>T. bilis</i> ISU324        | <i>T. bilis</i> PIG517 |
|------------------------------|-----------------------------------------|-------------------------------------|-------------------------------|------------------------|
| Biochemical reactivity:      |                                         |                                     |                               |                        |
| a,D-glucoside                | +                                       | -                                   | -                             | +                      |
| a,D-galactoside              | +                                       | -                                   | -                             | -                      |
| Glycine-b                    | +                                       | -                                   | -                             | -                      |
| Arginine-b                   | -                                       | +                                   | -                             | +                      |
| Serine-b                     | +                                       | -                                   | -                             | w                      |
| gelatin                      | +                                       | +                                   | +                             | +                      |
| esculin                      | ±                                       | ±                                   | +                             | +                      |
| Methyl-beta-D-xylopyranoside | -                                       | -                                   | -                             | w                      |
| D-glucose                    | -                                       | -                                   | -                             | w                      |
| Arbutin                      | -                                       | -                                   | -                             | w                      |
| Salicin                      | -                                       | -                                   | -                             | w                      |
| D-cellobiose                 | -                                       | -                                   | -                             | w                      |
| D-maltose                    | +                                       | -                                   | -                             | w                      |
| D-lactose (bovine origin)    | -                                       | -                                   | -                             | w                      |
| Potassium 5-ketogluconate    | w                                       | -                                   | -                             | -                      |
| *SCFAs                       | Ac, Lac                                 | Ac, But, Lac, Val, Cap,<br>Phen     | Ac, But, Lac, Cap, Ox,<br>Suc | Ac, But, Lac, Cap, Suc |
| Genome Length (Mb)           | 2.9                                     | 2.7                                 | 2.8                           | 2.6                    |
| Genome G+C content (mol%)    | 34.2                                    | 34.3                                | 34.1                          | 34.3                   |

Table S1. Comparison of biochemical reactivity, fermentation end products, and genome characteristics of MMM721<sup>T</sup>, ISU324, and PIG517 with *Turicibacter sanguinis* MOL361<sup>T</sup>.

+, positive; -, negative; w, weak; ±, variable. Characteristics for *T. sanguinis* MOL361<sup>T</sup> were taken from Bosshard *et al.* (3).

SCFAs: Ac, Acetic acid; But, Butyric acid; Cap, Caproic acid; Lac, Lactic acid; Ox, Oxalic acid; Phen, Phenylacetic acid; Suc, Succinic acid; Val, Valeric acid.

| Strain     | Substrate | Formate | Acetate | Propionate | Isobutyrate | Butyrate | Lactate 1 | Lactate 2 | Isovalerate | Valerate | Caproate | Oxalate | Succinate | Phenylacetate |
|------------|-----------|---------|---------|------------|-------------|----------|-----------|-----------|-------------|----------|----------|---------|-----------|---------------|
| <b>MMM</b> | BHIGL     | -       | ++      | -          | -           | ++       | +++       | +++       | -           | -        | +        | -       | -         | -             |
|            | Gelatin   | -       | ++      | -          | -           | ++       | +++       | +++       | -           | -        | +        | -       | -         | +             |
|            | Arginine  | -       | ++      | -          | -           | ++       | +++       | +++       | -           | +++      | +        | -       | -         | -             |
| <b>Pig</b> | BHIGL     | -       | -       | -          | -           | +        | +++       | +++       | -           | -        | -        | -       | -         | -             |
|            | Arginine  | -       | ++      | -          | -           | ++       | +++       | +++       | -           | -        | -        | -       | -         | -             |
|            | Gelatin   | -       | +       | -          | -           | ++       | +++       | +++       | -           | -        | +        | -       | +         | -             |
|            | Dextrose  | -       | ++      | -          | -           | ++       | +++       | +++       | -           | -        | +        | -       | -         | -             |
| <b>ISU</b> | BHIGL     | -       | ++      | -          | -           | ++       | +++       | +++       | -           | -        | +        | -       | -         | -             |
|            | Gelatin   | -       | ++      | -          | -           | ++       | +++       | +++       | -           | -        | +        | +       | +         | -             |

Table S2. Fermentation end products of MMM721<sup>T</sup>, ISU324, and PIG517 as measured by gas chromatograph (GC). Strains were grown in supplemented BHIGL broth for 48 hr at 42°C prior to extractions of fermentation end products. Measurements were normalized to uninoculated control tubes and all analyses were conducted in duplicate. -, <0.01 mM; +, 0.01-0.1 mM; ++, 0.1-1.0 mM, +++, >1.0 mM.

|                                             | 1            | 2            | 3            | 4     | 5            | 6            | 7     | 8            | 9            | 10           | 11    | 12           | 13           | 14           |
|---------------------------------------------|--------------|--------------|--------------|-------|--------------|--------------|-------|--------------|--------------|--------------|-------|--------------|--------------|--------------|
| <i>T. sanguinis</i> MGYG-HGUT-00143 (1)     | *            | 86.01        | <b>99.74</b> | 85    | <b>99.73</b> | <b>99.69</b> | 84.81 | 85.91        | <b>99.7</b>  | 83.53        | 85.03 | 85.87        | 86.01        | 85.84        |
| <i>Turicibacter</i> sp. H121 (2)            | 85.98        | *            | 85.74        | 85.25 | 85.65        | 85.59        | 85.11 | <b>98.62</b> | 85.71        | <b>83.85</b> | 84.48 | <b>98.52</b> | <b>98.88</b> | <b>98.47</b> |
| <i>T. sanguinis</i> PC909 (3)               | <b>99.74</b> | 85.77        | *            | 84.92 | <b>99.76</b> | <b>99.67</b> | 84.74 | 85.74        | <b>99.79</b> | 84.32        | 84.9  | 86.07        | 85.89        | 85.94        |
| <i>Turicibacter</i> sp. UBA1159 (4)         | 85           | 85.26        | 84.92        | *     | 84.95        | 84.92        | 86.49 | 85.32        | 84.84        | 83.08        | 84.03 | 85.32        | 85.25        | 85.46        |
| <i>T. sanguinis</i> am_0171 (5)             | <b>99.72</b> | 85.67        | <b>99.76</b> | 84.96 | *            | <b>99.64</b> | 84.78 | 85.66        | <b>99.75</b> | 83.04        | 84.79 | 85.58        | 85.7         | 85.52        |
| <i>Turicibacter</i> sp. HGF1 (6)            | <b>99.69</b> | 85.6         | <b>99.68</b> | 84.92 | <b>99.64</b> | *            | 84.86 | 85.57        | <b>99.65</b> | 83.11        | 84.95 | 85.57        | 85.66        | 85.46        |
| <i>Turicibacter</i> sp. UBA7094 (7)         | 84.81        | 85.11        | 84.74        | 86.48 | 84.79        | 84.86        | *     | 85.05        | 84.8         | 83.07        | 84.46 | 85.13        | 85.06        | 85.14        |
| <i>T. sanguinis</i> MGYG-HGUT-00037 (8)     | 85.89        | <b>98.62</b> | 85.73        | 85.32 | 85.65        | 85.56        | 85.05 | *            | 85.84        | 83.85        | 84.63 | <b>98.63</b> | <b>98.63</b> | <b>98.57</b> |
| <i>T. sanguinis</i> MOL361 <sup>T</sup> (9) | <b>99.7</b>  | 85.72        | <b>99.78</b> | 84.84 | <b>99.74</b> | <b>99.65</b> | 84.8  | 85.85        | *            | 83.52        | 85.01 | 86.07        | 85.8         | 86           |
| <i>Turicibacter</i> sp. Lab288P1bin27 (10)  | 83.53        | 83.85        | 84.32        | 83.08 | 83.04        | 83.11        | 83.07 | 83.85        | 83.52        | *            | 86.81 | 83.85        | 83.85        | 83.85        |
| <i>Turicibacter</i> sp. Nc150P1bin9 (11)    | 85.09        | 84.47        | 84.9         | 84.03 | 84.8         | 84.93        | 84.46 | 84.66        | 85.02        | 86.81        | *     | 84.66        | 84.34        | 84.49        |
| <i>T. bilis</i> ISU324 (12)                 | 85.86        | <b>98.53</b> | 86.04        | 85.31 | 85.55        | 85.54        | 85.13 | <b>98.62</b> | 86.04        | 83.85        | 84.66 | *            | <b>98.51</b> | <b>99.14</b> |
| <i>T. bilis</i> PIG517 (13)                 | 85.99        | <b>98.88</b> | 85.88        | 85.23 | 85.68        | 85.65        | 85.06 | <b>98.62</b> | 85.79        | 83.85        | 84.34 | <b>98.51</b> | *            | <b>98.44</b> |
| <i>T. bilis</i> MMM721 <sup>T</sup> (14)    | 85.81        | <b>98.48</b> | 85.91        | 85.44 | 85.49        | 85.44        | 85.14 | <b>98.57</b> | 85.97        | 83.85        | 84.49 | <b>99.14</b> | <b>98.42</b> | *            |

Table S3. Pairwise comparison of ANIm values between MMM721<sup>T</sup>, ISU324, PIG517, and all publicly available genomes on the PathoSystems Resource Integration Center (PATRIC) genome database. Bolded values exceed the 95-96% threshold for species assignment. The \* indicates 100% similarity when genomes were compared against themselves.

|                                             | 1           | 2           | 3           | 4    | 5           | 6           | 7    | 8           | 9           | 10   | 11   | 12          | 13          | 14          |
|---------------------------------------------|-------------|-------------|-------------|------|-------------|-------------|------|-------------|-------------|------|------|-------------|-------------|-------------|
| <i>T. sanguinis</i> MGYG-HGUT-00143 (1)     | *           | 23.1        | <b>97.7</b> | 21.2 | <b>97.8</b> | <b>97.2</b> | 20.7 | 22.3        | <b>97.3</b> | 17.2 | 25.3 | 22.4        | 22.5        | 22.5        |
| <i>Turicibacter</i> sp. H121 (2)            | 23.1        | *           | 22.8        | 22.7 | 22.6        | 22.1        | 22.2 | <b>86.8</b> | 22.7        | 23.5 | 25.9 | <b>86.2</b> | <b>90.2</b> | <b>85.9</b> |
| <i>T. sanguinis</i> PC909 (3)               | <b>97.7</b> | 22.8        | *           | 21.1 | <b>97.9</b> | <b>97.1</b> | 20.7 | 22.1        | <b>98.3</b> | 16.9 | 24.7 | 22.5        | 22.2        | 22.5        |
| <i>Turicibacter</i> sp. UBA1159 (4)         | 21.2        | 22.7        | 21.1        | *    | 21.0        | 21.1        | 26.5 | 22.8        | 21.0        | 21.9 | 23.4 | 22.8        | 22.6        | 22.7        |
| <i>T. sanguinis</i> am_0171 (5)             | <b>97.8</b> | 22.6        | <b>97.9</b> | 21.0 | *           | <b>97.1</b> | 20.5 | 22.0        | <b>98.0</b> | 17.0 | 24.5 | 21.9        | 22.0        | 21.9        |
| <i>Turicibacter</i> sp. HGF1 (6)            | <b>97.2</b> | 22.1        | <b>97.1</b> | 21.1 | <b>97.1</b> | *           | 20.7 | 21.9        | <b>96.9</b> | 16.8 | 24.7 | 22.0        | 22.0        | 22.1        |
| <i>Turicibacter</i> sp. UBA7094 (7)         | 20.7        | 22.2        | 20.7        | 26.5 | 20.5        | 20.7        | *    | 22.3        | 20.5        | 21.2 | 22.8 | 22.3        | 22.2        | 22.3        |
| <i>T. sanguinis</i> MGYG-HGUT-00037 (8)     | 22.3        | <b>86.8</b> | 22.1        | 22.8 | 22.0        | 21.9        | 22.3 | *           | 22.1        | 22.6 | 26.0 | <b>87.1</b> | <b>86.6</b> | <b>86.2</b> |
| <i>T. sanguinis</i> MOL361 <sup>T</sup> (9) | <b>97.3</b> | 22.7        | <b>98.3</b> | 21.0 | <b>98.0</b> | <b>96.9</b> | 20.5 | 22.1        | *           | 17.1 | 24.8 | 22.5        | 22.1        | 22.5        |
| <i>Turicibacter</i> sp. Lab288P1bin27 (10)  | 17.2        | 23.5        | 16.9        | 21.9 | 17.0        | 16.8        | 21.2 | 22.6        | 17.1        | *    | 15.7 | 23.0        | 23.2        | 23.1        |
| <i>Turicibacter</i> sp. Nc150P1bin9 (11)    | 25.3        | 25.9        | 24.7        | 23.4 | 24.5        | 24.7        | 22.8 | 26.0        | 24.8        | 15.7 | *    | 25.8        | 25.7        | 25.8        |
| <i>T. bilis</i> ISU324 (12)                 | 22.4        | <b>86.2</b> | 22.5        | 22.8 | 21.9        | 22.0        | 22.3 | <b>87.1</b> | 22.5        | 23.0 | 25.8 | *           | <b>85.9</b> | <b>92.3</b> |
| <i>T. bilis</i> PIG517 (13)                 | 22.5        | <b>90.2</b> | 22.2        | 22.6 | 22.0        | 22.0        | 22.2 | <b>86.6</b> | 22.1        | 23.2 | 25.7 | <b>85.9</b> | *           | <b>84.2</b> |
| <i>T. bilis</i> MMM721 <sup>T</sup> (14)    | 22.5        | <b>85.9</b> | 22.5        | 22.7 | 21.9        | 22.1        | 22.3 | <b>86.2</b> | 22.5        | 23.1 | 25.8 | <b>92.3</b> | <b>84.2</b> | *           |

Table S4. Pairwise comparison of dDDH values between MMM721<sup>T</sup>, ISU324, PIG517, and all publicly available genomes on the PathoSystems Resource Integration Center (PATRIC) genome database. Bolded values exceed the 70% threshold for species assignment. The \* indicates 100% similarity when genomes were compared against themselves.

References:

1. Cole JR, Wang Q, Fish JA, Chai B, McGarrell DM, Sun Y, et al. Ribosomal Database Project: data and tools for high throughput rRNA analysis. *Nucleic Acids Res.* 2014;42(Database issue):D633-42.
2. Tamura K, Stecher G, Kumar S. MEGA11: Molecular Evolutionary Genetics Analysis Version 11. *Mol Biol Evol.* 2021;38(7):3022-7.
3. Bosshard PP, Zbinden R, Altwegg M. *Turicibacter sanguinis* gen. nov., sp. nov., a novel anaerobic, Gram-positive bacterium. *Int J Syst Evol Microbiol.* 2002;52(4):1263-6.
